# Supplementary material for: Source contribution to ozone pollution during June 2021 in Arizona: Insights from WRF-Chem tagged O 3 and CO
Source: Copernicus journal article supplement (doi:10.5194/egusphere-2024-2617), 2024-09-18
Supplement: Supplementary file 1 [file egusphere-2024-2617-supplement.pdf]

**Table S1. Information for EPA AQS sites, including site number, location, site name, and urban setting. Locations are shown on the map in Figure 1. Urban settings are classified into three categories: suburban, urban, and rural.**

| Site # | AQS Site Number | Location           | AQS Site Name         | Location Setting |
|--------|-----------------|--------------------|-----------------------|------------------|
| 1      | 04-013-1003     | 33.41018, 111.865  | Mesa                  | Suburban         |
| 2      | 04-013-1004     | 33.56031, -112.066 | North Phoenix         | Urban            |
| 3      | 04-013-1010     | 33.45244, -111.733 | Falcon Field          | Rural            |
| 4      | 04-013-19       | 33.48378, -112.143 | West Phoenix          | Suburban         |
| 5      | 04-013-2001     | 33.57453, -112.192 | Glendale              | Rural            |
| 6      | 04-013-2005     | 33.70639, -111.856 | Pinnacle Peak         | Suburban         |
| 7      | 04-013-3002     | 33.45797, -112.047 | Central Phoenix       | Urban            |
| 8      | 04-013-3003     | 33.47968, -111.917 | South Scottsdale      | Suburban         |
| 9      | 04-013-4003     | 33.40314, -112.075 | South Phoenix         | Urban            |
| 10     | 04-013-4004     | 33.29896, -111.884 | West Chandler         | Suburban         |
| 11     | 04-013-4005     | 33.41123, -111.935 | Tempe                 | Urban            |
| 12     | 04-013-4008     | 33.82169, -112.017 | Cave Creek            | Rural            |
| 13     | 04-013-4010     | 33.63718, -112.342 | Dysart                | Suburban         |
| 14     | 04-013-4011     | 33.36985, -112.621 | Buckeye               | Rural            |
| 15     | 04-013-7003     | 33.29023, -112.161 | St Johns Station      | Rural            |
| 16     | 04-013-7020     | 33.48813, -111.855 | Senior Center Station | Rural            |
| 17     | 04-013-7021     | 33.50799, -111.755 | Red Mountain Station  | Rural            |
| 18     | 04-013-7022     | 33.47461, -111.806 | Lehi Station          | Rural            |
| 19     | 04-013-7024     | 33.50813, -111.839 | High School Station   | Rural            |
| 20     | 04-013-9508     | 33.9828, -111.799  | Humboldt Mountain     | Rural            |
| 21     | 04-013-9702     | 33.54558, -111.61  | Blue Point            | Rural            |
| 22     | 04-013-9704     | 33.61092, -111.725 | Fountain Hills        | Suburban         |
| 23     | 04-013-9997     | 33.50383, -112.096 | JLG Supersite         | Urban            |

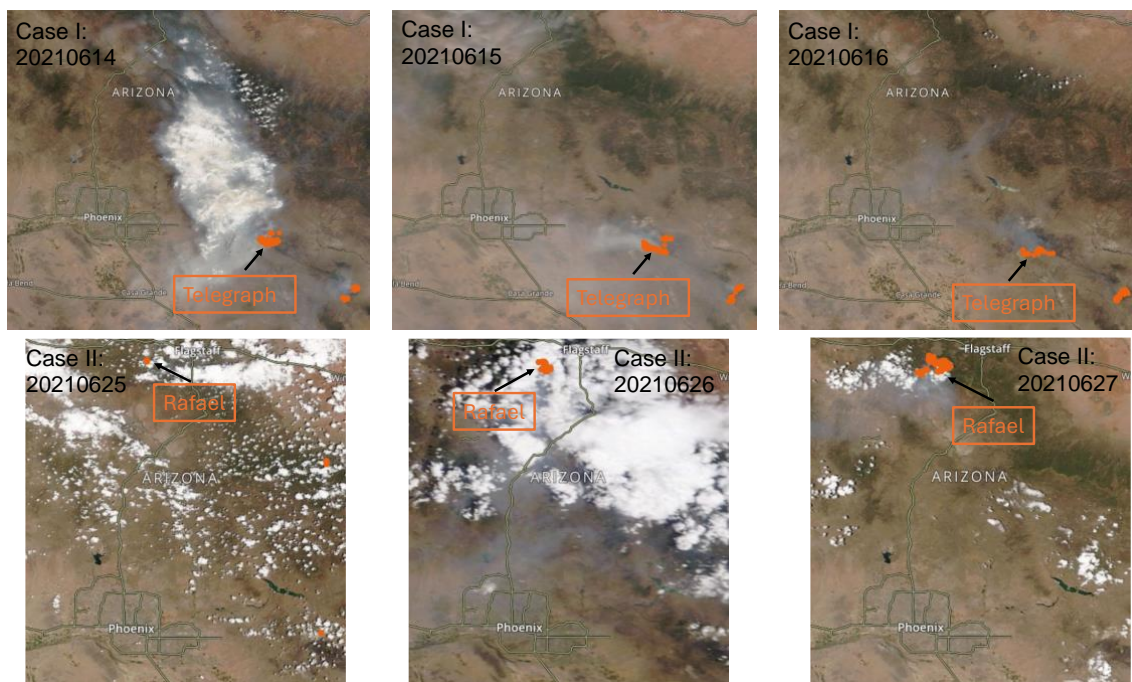

**Figure S1.** Screenshots from the MODIS Terra Corrected Reflectance map overlaid with MODIS fires and thermal anomaly products (orange area), generated using Worldview available at [worldview.earthdata.nasa.gov](http://worldview.earthdata.nasa.gov). The top panel shows Case I from June 14 to 16 (2021), and the bottom panel shows Case II from June 25 to 27 (2021).

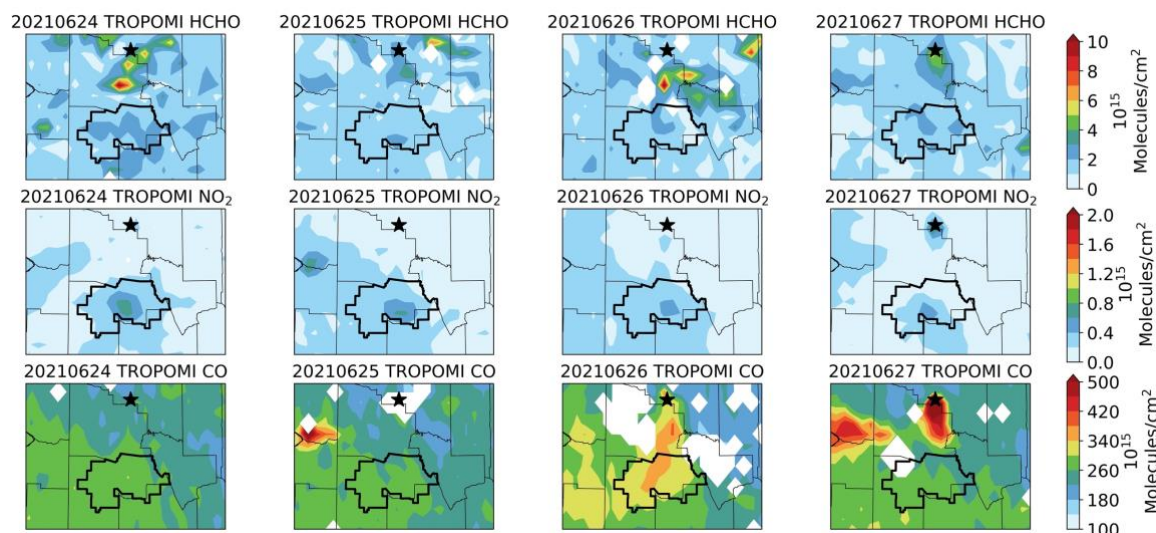

**Figure S2.** TROPOMI tropospheric columnar HCHO (top), NO<sub>2</sub> (middle), and CO (bottom) concentrations during the smoke periods for Case II over Phoenix area. The black polygon lines represent the EPA designated Phoenix-Mesa nonattainment area. The grid resolution is 0.2°. Grids without available data are marked as white space.

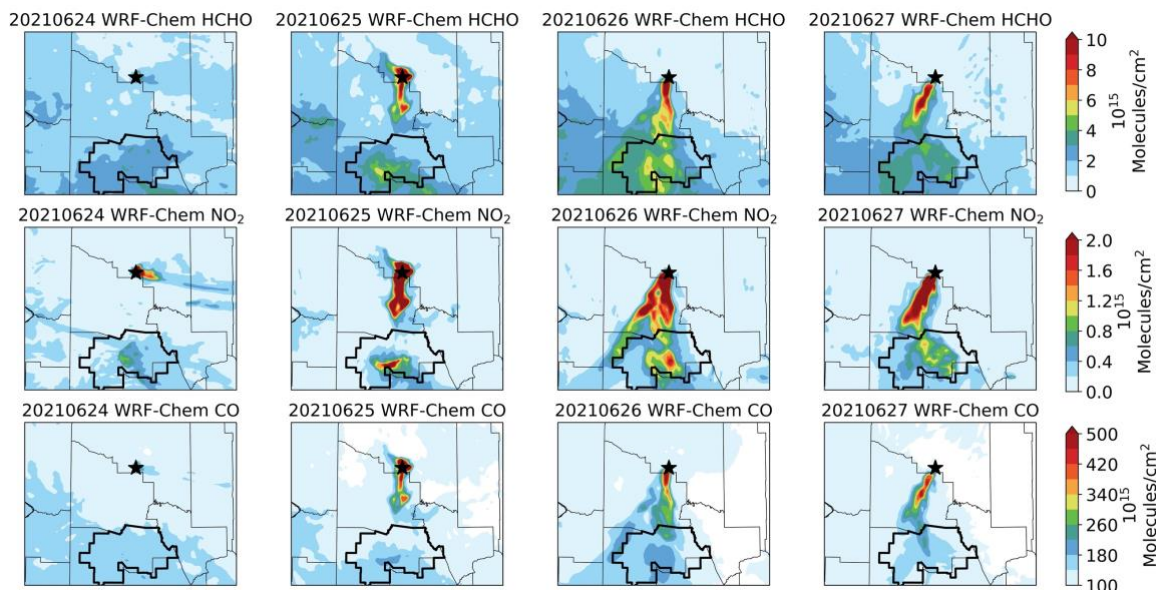

**Figure S3. WRF-Chem simulated tropospheric columnar HCHO, NO<sub>2</sub>, and CO concentrations at local time 18:00 for Case II over Phoenix area.**

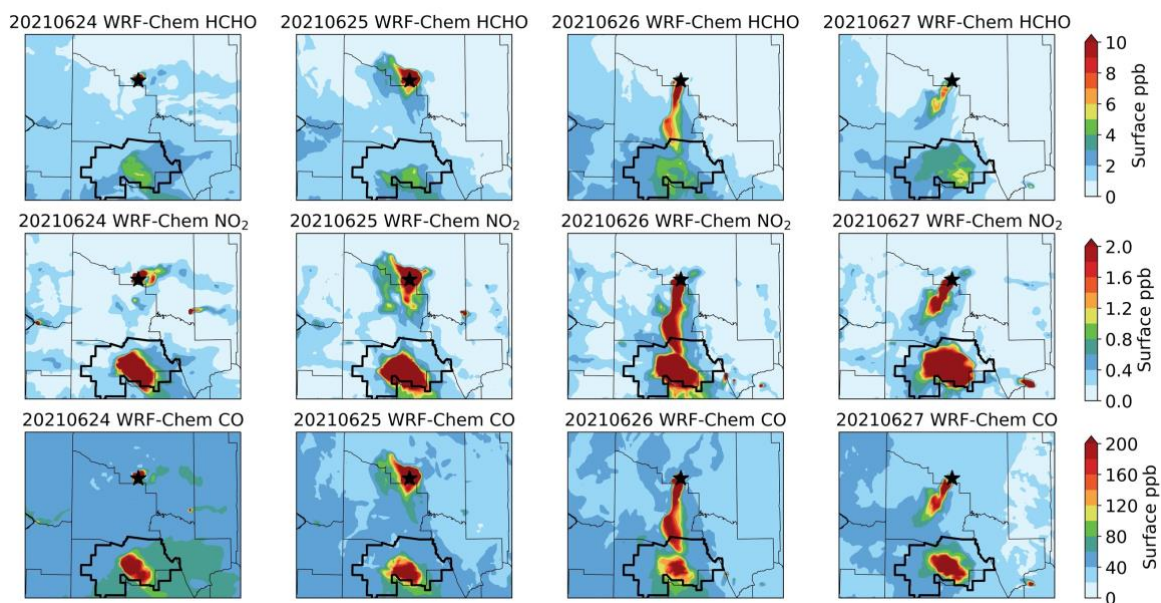

**Figure S4. Same as Figure S3, but for surface concentrations.**

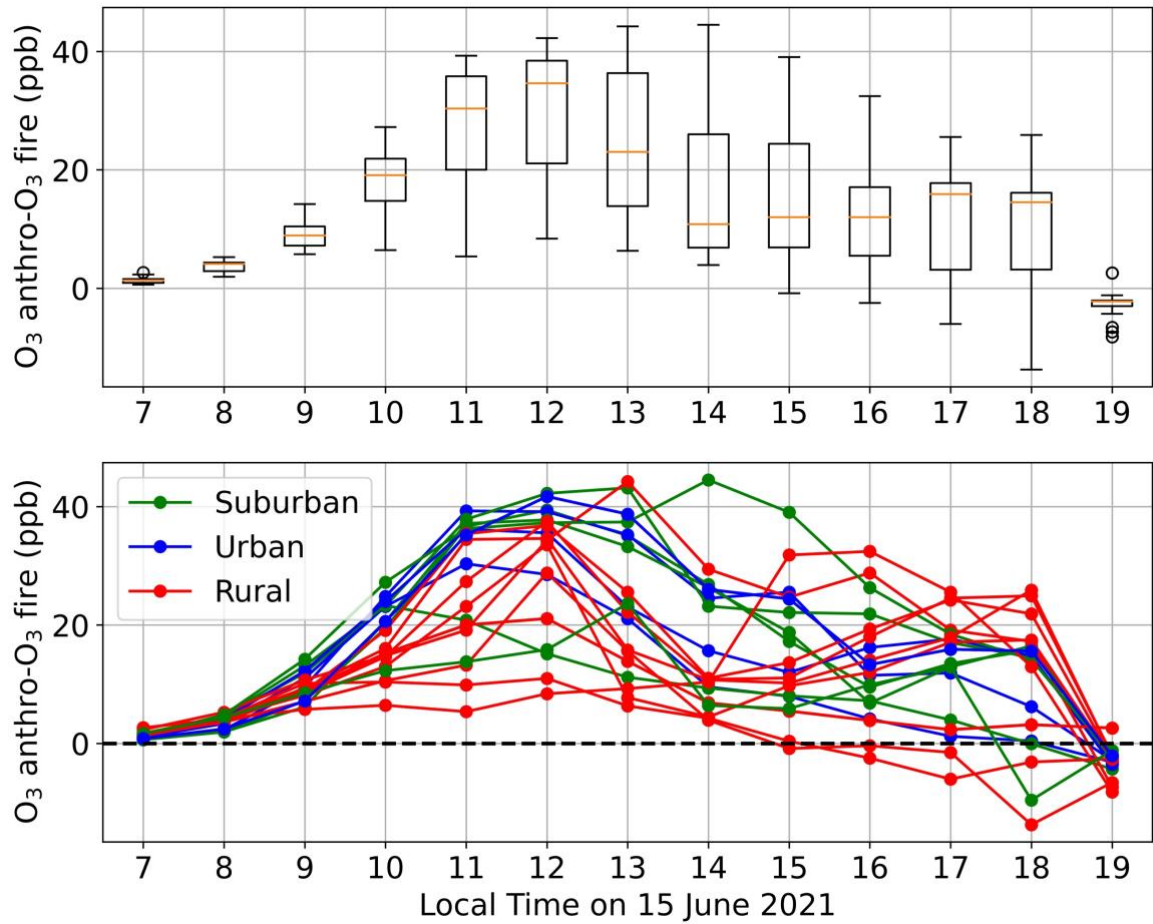

**Figure S5. Comparison of O<sub>3</sub> concentrations contributed by Arizona anthropogenic and fire emissions on June 15, 2021. The top panel presents boxplots of their difference through the daytime. The bottom panel shows the hourly variation of O<sub>3</sub> difference across different site types: Suburban (green), Urban (blue), and Rural (red) as listed in Table S1.**

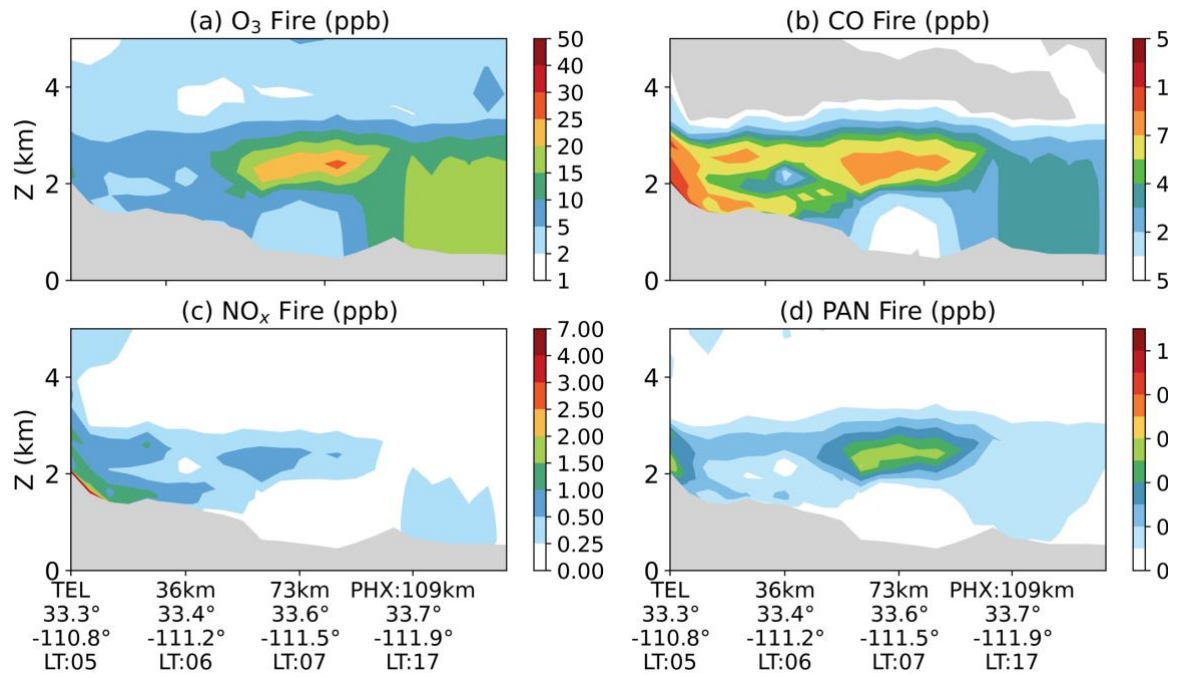

**Figure S6. Cross-sectional analysis of a smoke plume traveling towards Phoenix during case I, showing vertical and horizontal distribution of various pollutants. The subplots represent concentrations of (a) O<sub>3</sub>, (b) CO, (c) NO<sub>x</sub>, (d) HCHO, (e) PM<sub>2.5</sub>, and (f) PAN (Peroxyacetyl Nitrate) across different altitudes and distances from the fire. The grey shading represents the topography heights.**

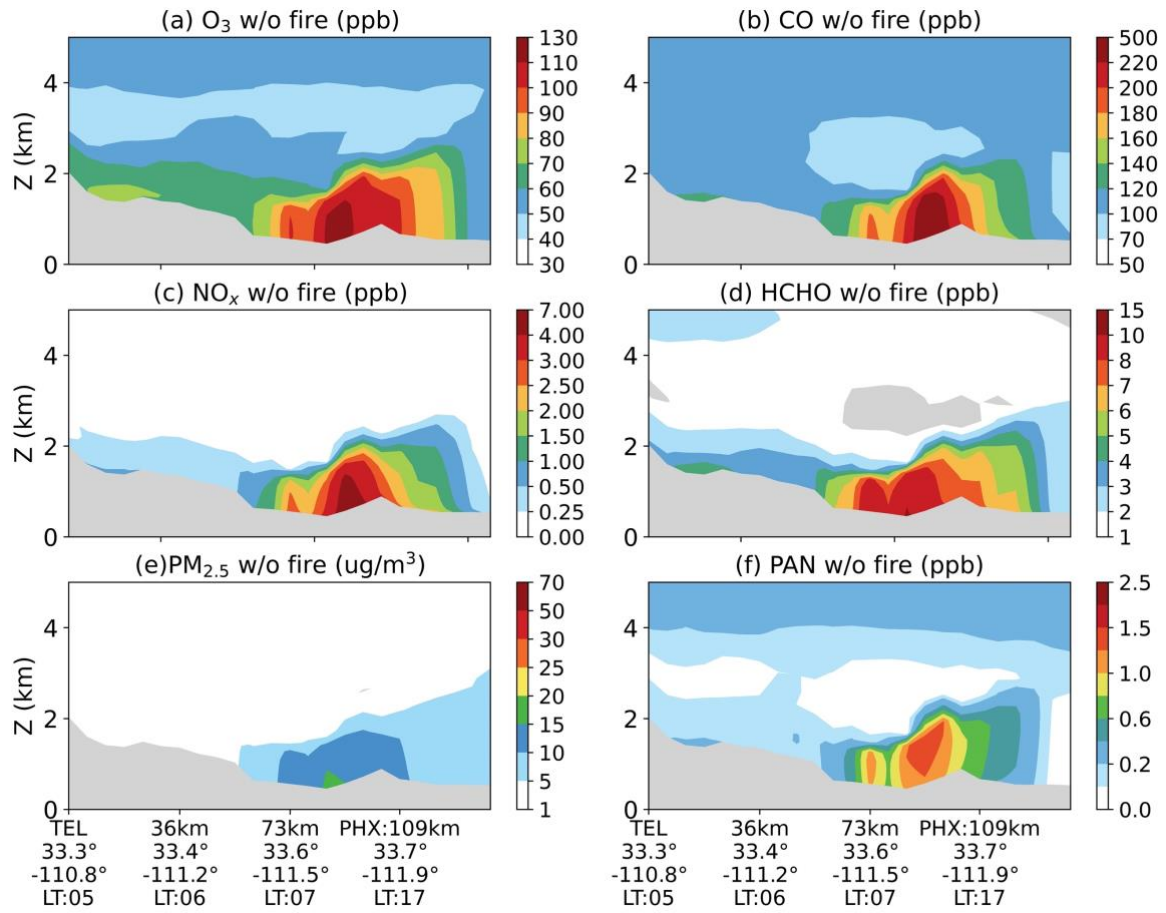

**Figure S7. Same as Figure 15, but for scenario without fire emissions.**
